# Supplementary material for: Identification of a Novel Non-Canonical Splice-Site Variant in ABCD1
Source: MDPI journal article supplement (doi:10.3390/jcm12020473), 2023-01-06
Supplement: s1 [file s1]

Supplementary Materials

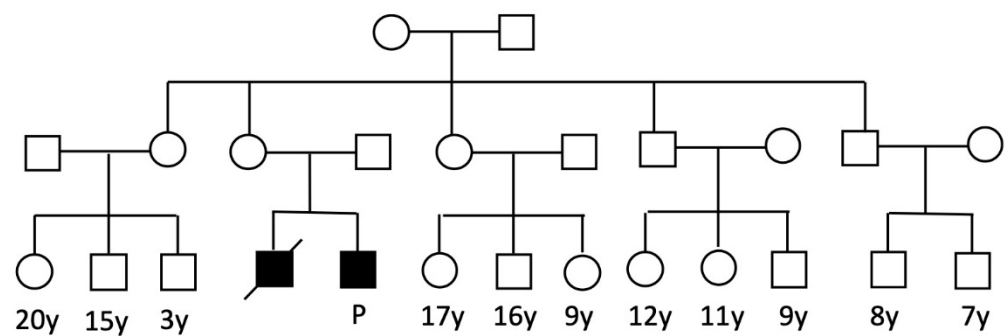

**Figure S1.** Pedigree of the extended family of the mother.

**Table S1.** Genes in the leukodystrophy multi-gene panel.

| Panel          | Genes                                                                                                                                                                                                                                                                                                                                                                                                                                      |
|----------------|--------------------------------------------------------------------------------------------------------------------------------------------------------------------------------------------------------------------------------------------------------------------------------------------------------------------------------------------------------------------------------------------------------------------------------------------|
| Leukodystrophy | <i>ABCD1, ARSA, CSF1R, EIF2B2, GJC2, PEX1, POLR3A, POLR3B, PSAP, TREX1, EIF2B1, EIF2B3, EIF2B4, EIF2B5, PLP1, GFAP, ASPA, MLC1, HEPACAM, CYP27A1, GBE1, RNASEH2A, RNASEH2B, RNASEH2C, SAMHD1, ADAR, LMNB1, SLC17A5, FUCA1, FAM126A, GALC, L2HGDH, DARS2, EARS2, SUMF1, GJA1, RNASET2, HSD17B4, ACOX1, SCP2, ALDH3A2, SOX10, MFSD8, HSPD1, MPV17, PEX10, PEX13, PEX5, PEX6, POLR1C, SDHA, SDHB, TMEM187, NOTCH3, HTRA1; ABCD1/PLP1-MLPA</i> |

**Table S2.** Variants identified by trio-WES in the family.

| Gene          | Variant                                                | GnomAD<br>MAF | ACMG<br>classification | Model of<br>inheritance                  | Zygoty       |              |              |
|---------------|--------------------------------------------------------|---------------|------------------------|------------------------------------------|--------------|--------------|--------------|
|               |                                                        |               |                        |                                          | Proband      | Father       | Mother       |
| <i>ABCD1</i>  | NM_000033.4:<br>intron 1:<br>c.901-25_901-<br>9del     | --            | VUS                    | XLR                                      | Hemizygote   | Wild type    | Heterozygote |
| <i>CPT2</i>   | NM_000098.3:<br>exon 4:<br>c.577C>T<br>(p.Arg193Cys)   | 0.0018        | VUS                    | 1. AD, AR<br>2. AR 3.<br>AR 4. AD,<br>AR | Heterozygote | Heterozygote | Wild type    |
| <i>AP4B1</i>  | NM_006594.5:<br>exon 10:<br>c.1591C>T<br>(p.Arg531Trp) | 0.0013        | VUS                    | AR                                       | Heterozygote | Heterozygote | Wild type    |
| <i>NDUFS1</i> | NM_005006.7:<br>exon 4:<br>c.261+9T>C                  | 0.000004062   | VUS                    | AR                                       | Heterozygote | Wild type    | Heterozygote |
| <i>ENTPD1</i> | NM_001776.6:<br>exon 2:<br>c.67T>C<br>(p.Phe23Leu)     | 0.000008124   | VUS                    | AR                                       | Heterozygote | Wild type    | Heterozygote |

Trio-WES, trio-whole-exome sequencing; VUS, variant of unknown significance; XLR, X-linked recessive; AR, autosomal recessive; AD, autosomal dominant
